# Supplementary material for: A comparison of clinical paediatric guidelines for hypotension with population-based lower centiles: a systematic review
Source: PubMed Central journal article supplement (PMC6882047; doi:10.1186/s13054-019-2653-9), 2019-11-27
Supplement: 13054_2019_2653_MOESM2_ESM.pdf [file 13054_2019_2653_MOESM2_ESM.pdf]

# Additional file 2 Clinical definitions for hypotension and range of 5th centile of systolic blood pressure for girls according to age

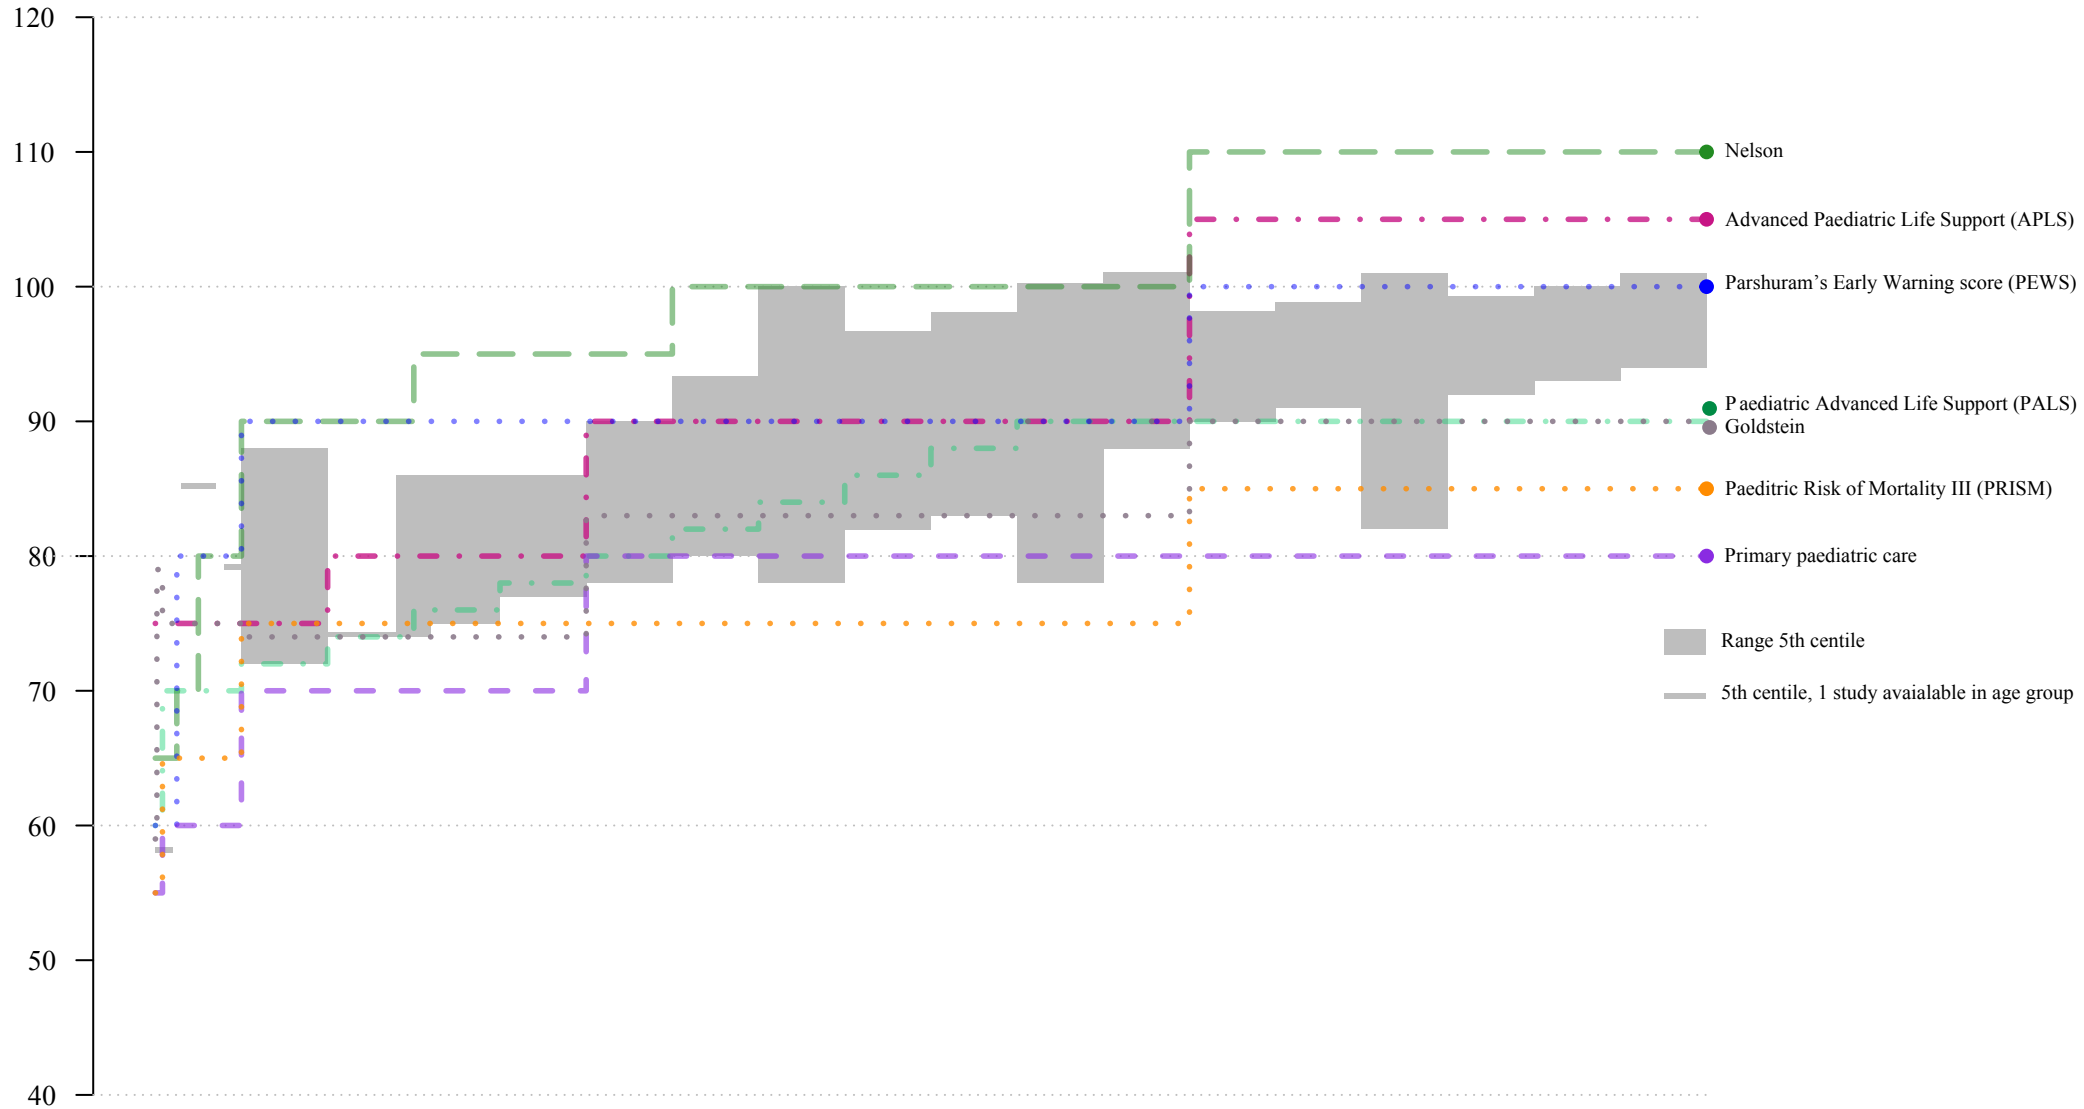

| Age in years                             | 0    | 1   | 2   | 3   | 4    | 5    | 6    | 7    | 8    | 9    | 10   | 11   | 12   | 13   | 14   | 15   | 16   | 17   | 18   |  |
|------------------------------------------|------|-----|-----|-----|------|------|------|------|------|------|------|------|------|------|------|------|------|------|------|--|
| <b>Bubble plot of total no. subjects</b> |      |     |     |     |      |      |      |      |      |      |      |      |      |      |      |      |      |      |      |  |
| <b>Total no. subjects</b>                | 1319 | 150 | 702 | 358 | 3064 | 3031 | 3569 | 3992 | 4942 | 4247 | 3788 | 3630 | 3038 | 2636 | 3232 | 2962 | 3593 | 5037 | 2354 |  |
| <b>Number of studies</b>                 | 1    | 1   | 3   | 1   | 5    | 4    | 6    | 6    | 7    | 6    | 6    | 7    | 6    | 6    | 6    | 7    | 7    | 5    | 3    |  |
