# Supplementary material for: A comparison of clinical paediatric guidelines for hypotension with population-based lower centiles: a systematic review
Source: PubMed Central journal article supplement (PMC6882047; doi:10.1186/s13054-019-2653-9), 2019-11-27

Additional file 3: 5th centile of systolic blood pressure and median (IQR) for boys

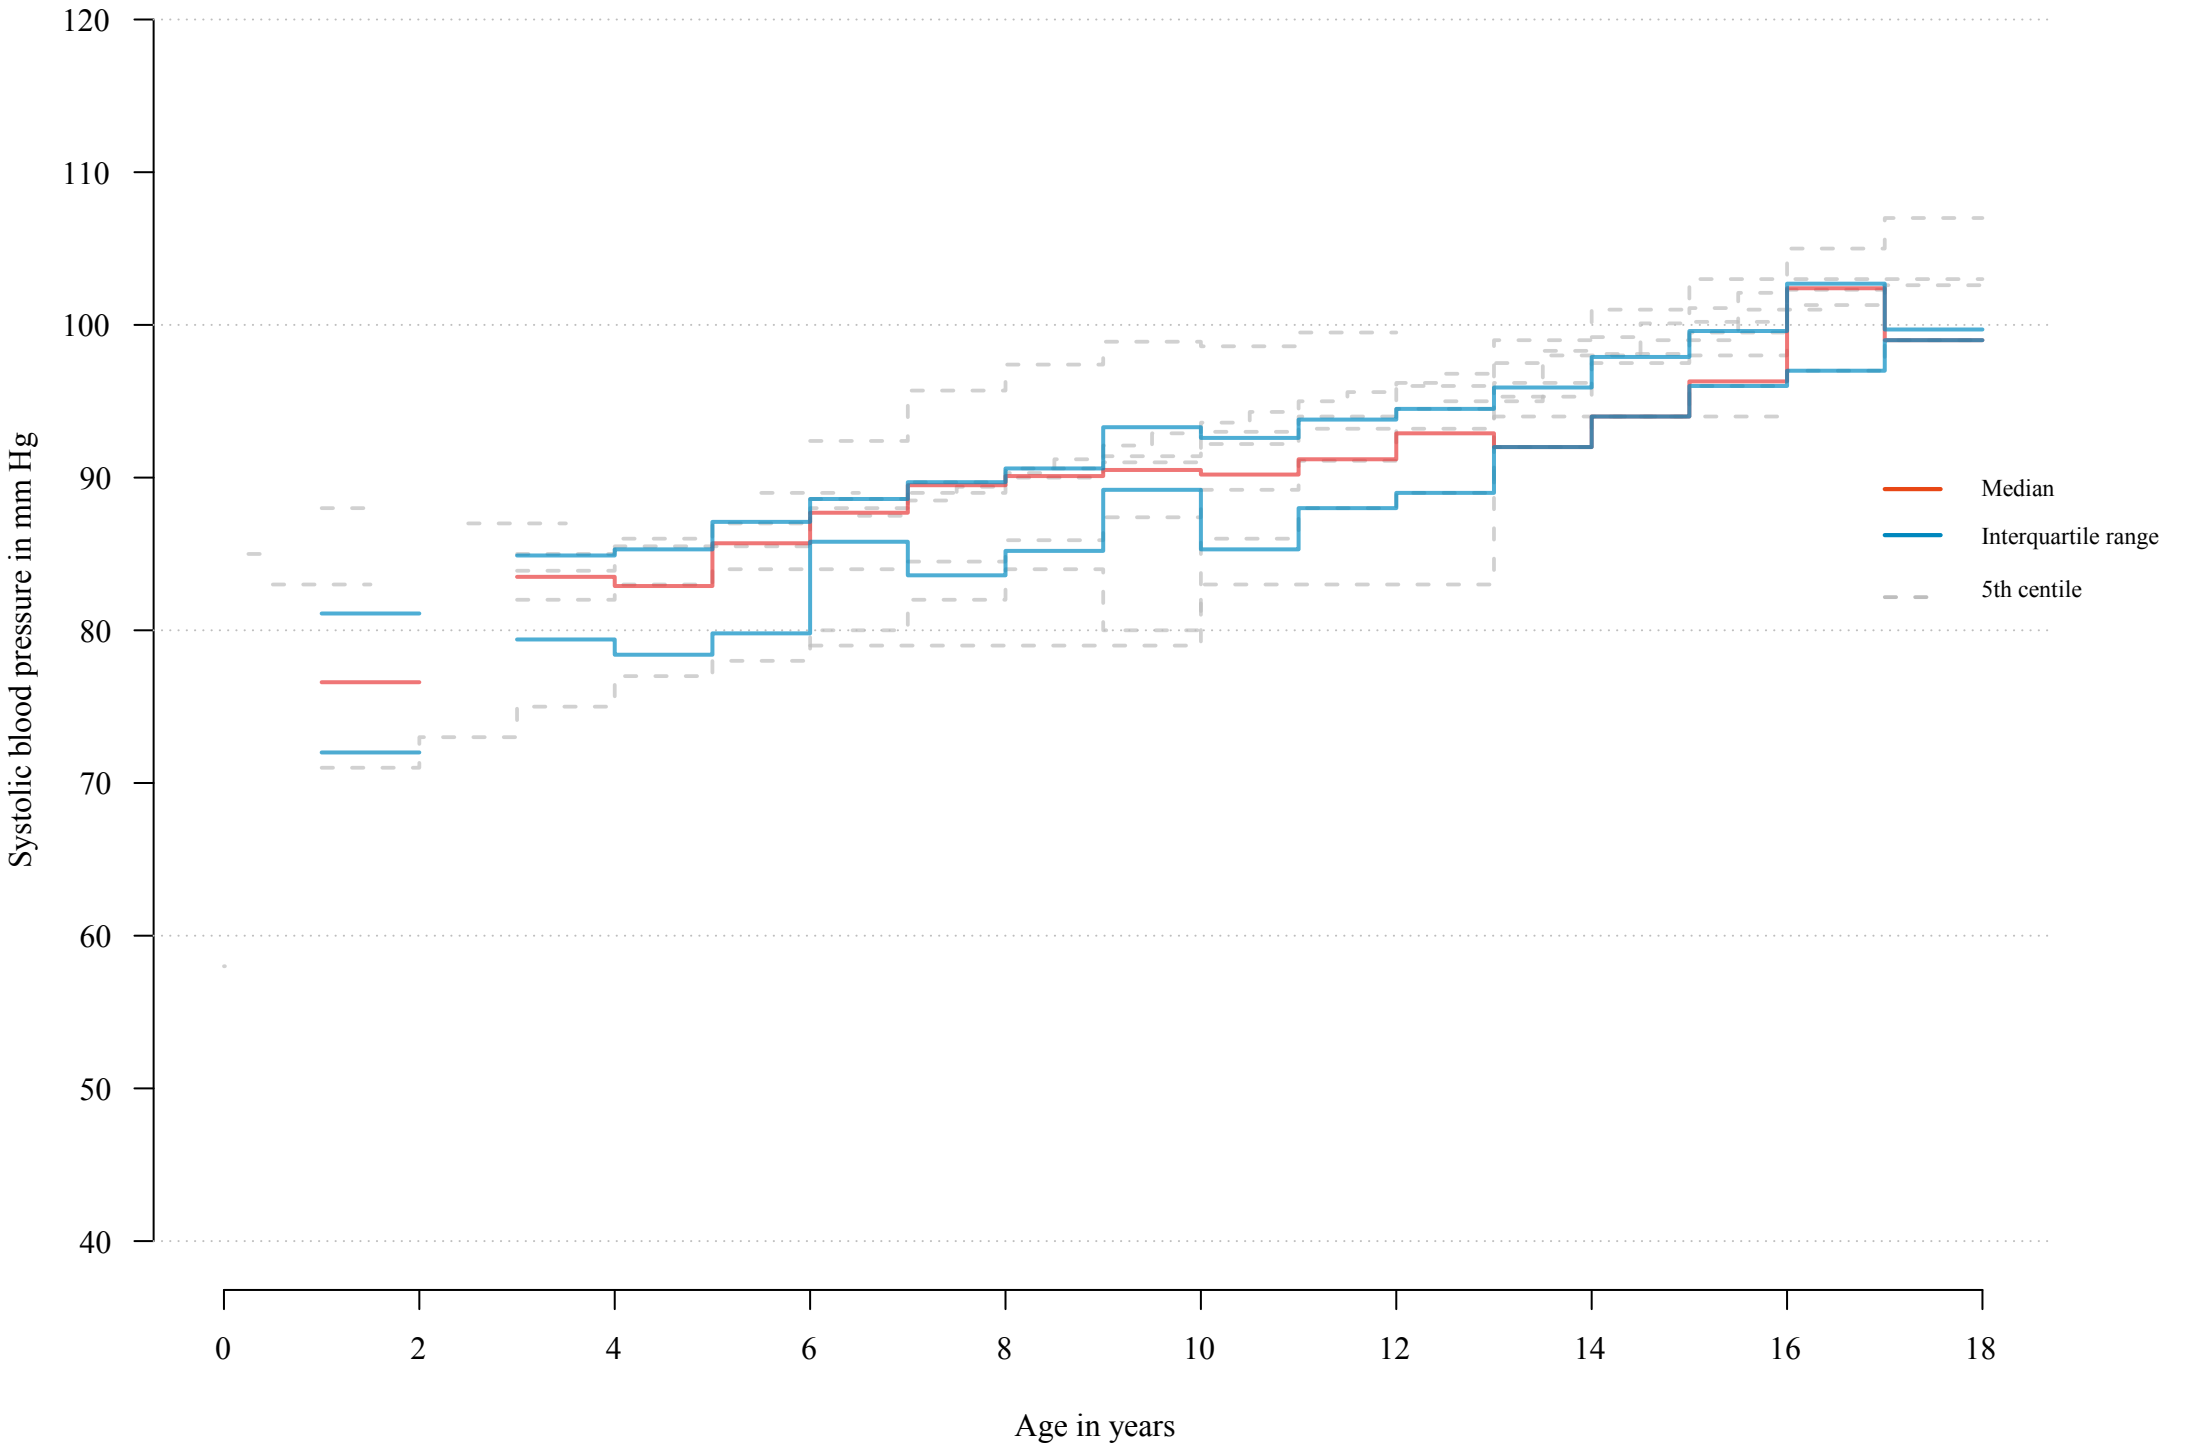

Supplement: 13054_2019_2653_MOESM3_ESM.pdf [file 13054_2019_2653_MOESM3_ESM.pdf]
